# Supplementary material for: CarD uses a minor groove wedge mechanism to stabilize the RNA polymerase open promoter complex
Source: eLife journal article supplement (doi:10.7554/elife.08505), 2015-09-08
Supplement: supp [file elife-08505-supp-v1.zip]

**A**

**23S**

**CarD**

**- + A F Y L I V**

**W85>**

**B**

AP3 -12T>

| T       | C | A | G | T    | C | A | G |
|---------|---|---|---|------|---|---|---|
| no CarD |   |   |   | CarD |   |   |   |

Bae et al., Figure 3 – figure supplement 1
