# Supplementary material for: CarD uses a minor groove wedge mechanism to stabilize the RNA polymerase open promoter complex
Source: eLife journal article supplement (doi:10.7554/elife.08505), 2015-09-08
Supplement: supp [file elife-08505-supp-v1.zip]

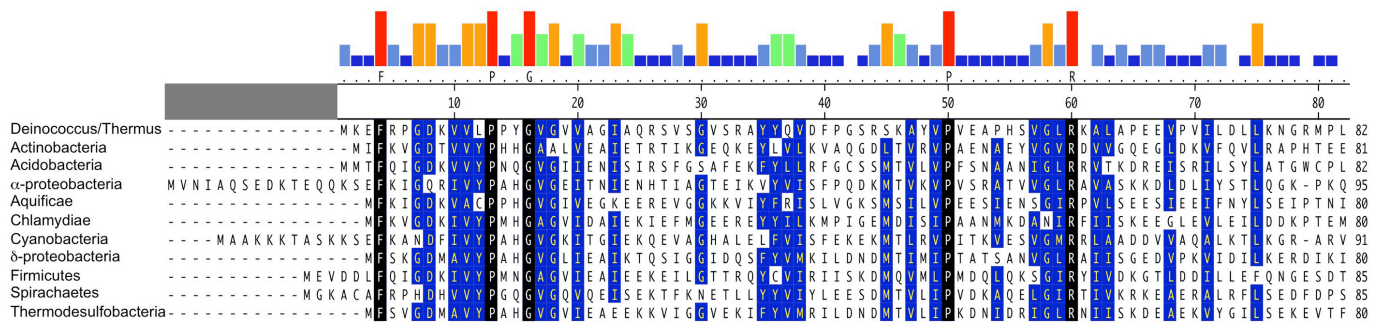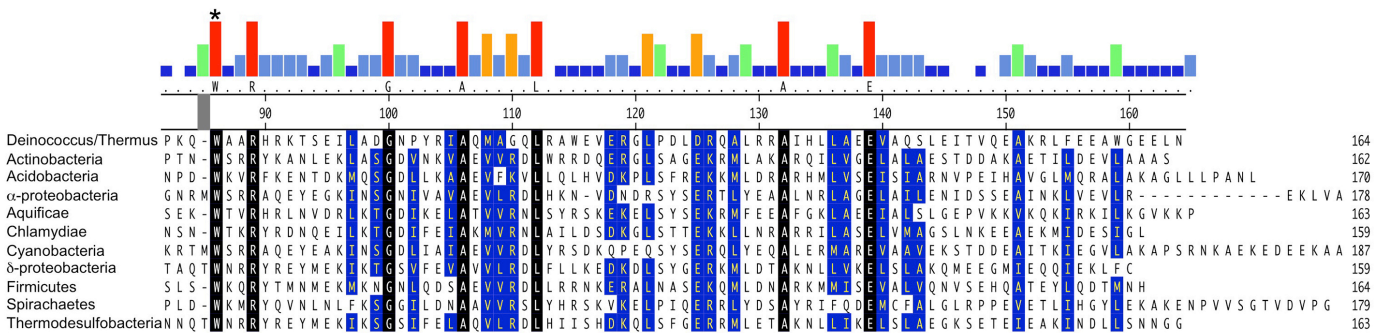

Columns (% identical in all eleven represented phyla) Shading  
 ■ 11/11 or 100 % ■ ≥9/11 homologous  
 ■ 9-10/11 or 82-91 % ■ 11 identical  
 ■ 7-8/11 or 64-73 %  
 ■ 5-6/11 or 45-54 %  
 ■ No consensus

Bae et al., Figure 2 – figure supplement 1
