# Supplementary figures and images for: CarD uses a minor groove wedge mechanism to stabilize the RNA polymerase open promoter complex
Source: eLife journal article supplement (doi:10.7554/elife.08505), 2015-09-08

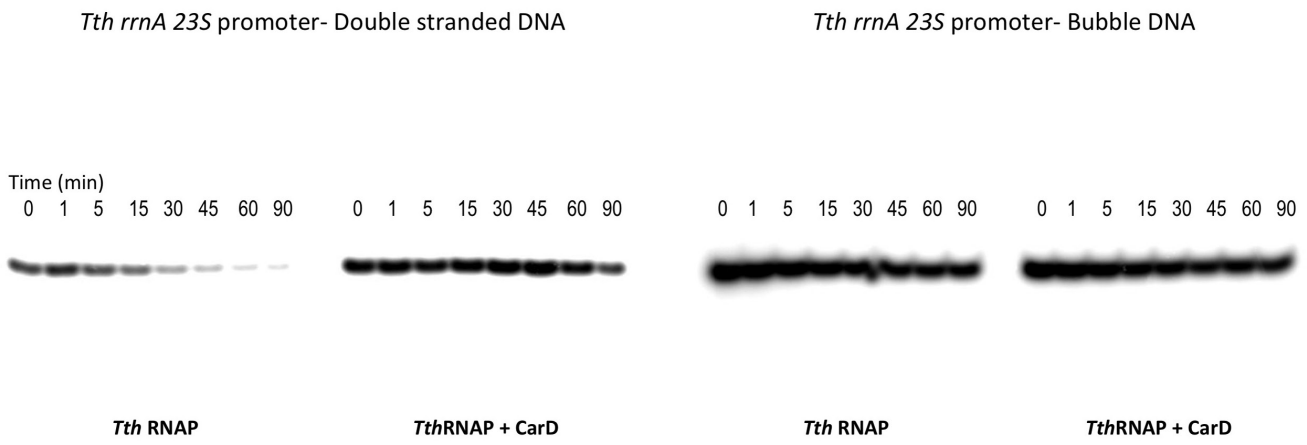

Bae et al., Figure 6 - figure supplement 1

Supplement: supp [file elife-08505-supp-v1.zip]

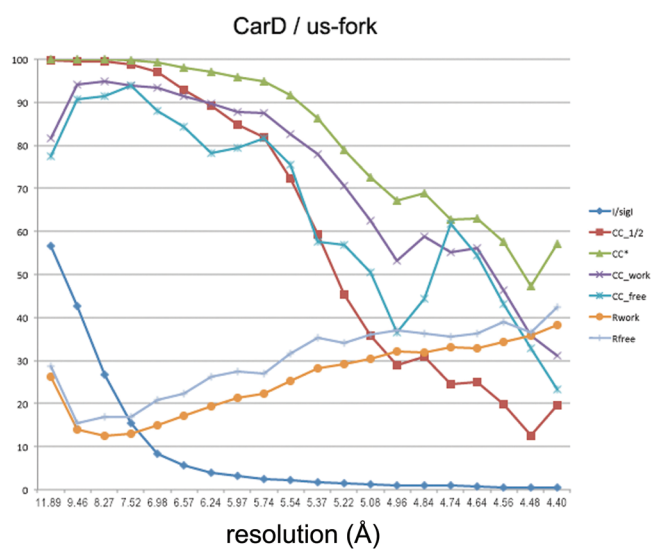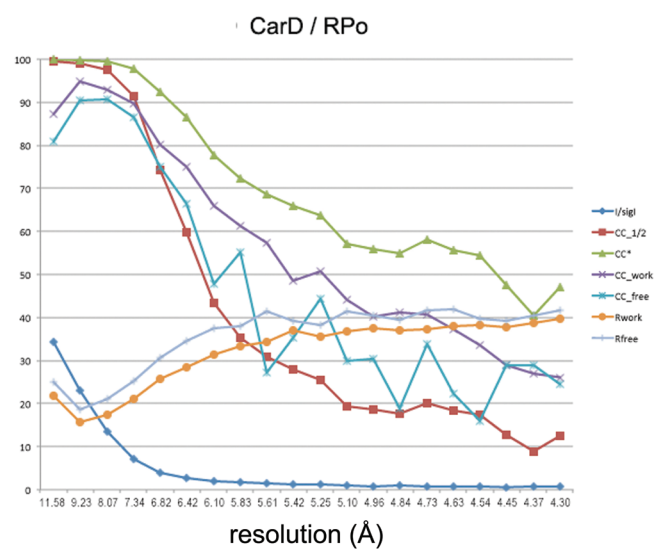

Bae et al, Figure 1 - figure supplement 5

Supplement: supp [file elife-08505-supp-v1.zip]

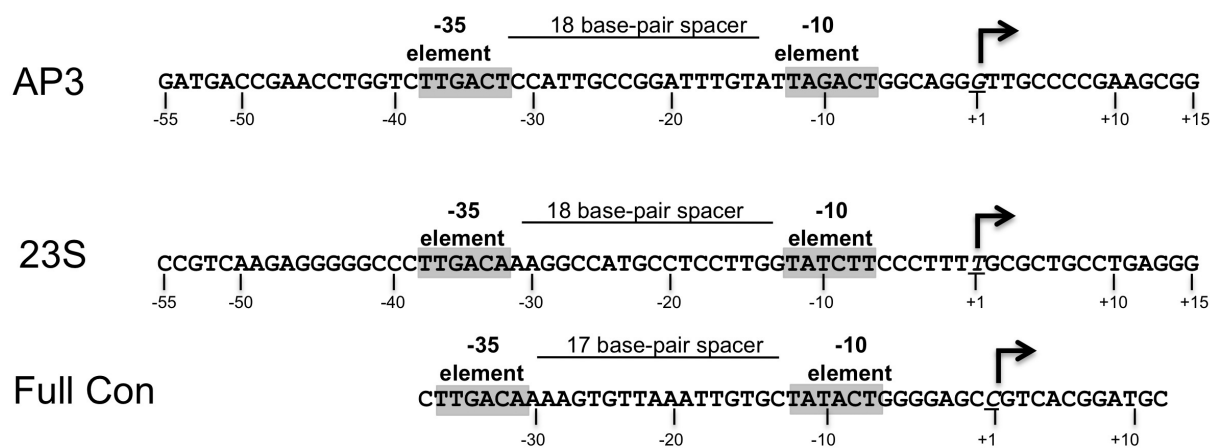

Bae et al., Figure 1 – figure supplement 1

Supplement: supp [file elife-08505-supp-v1.zip]

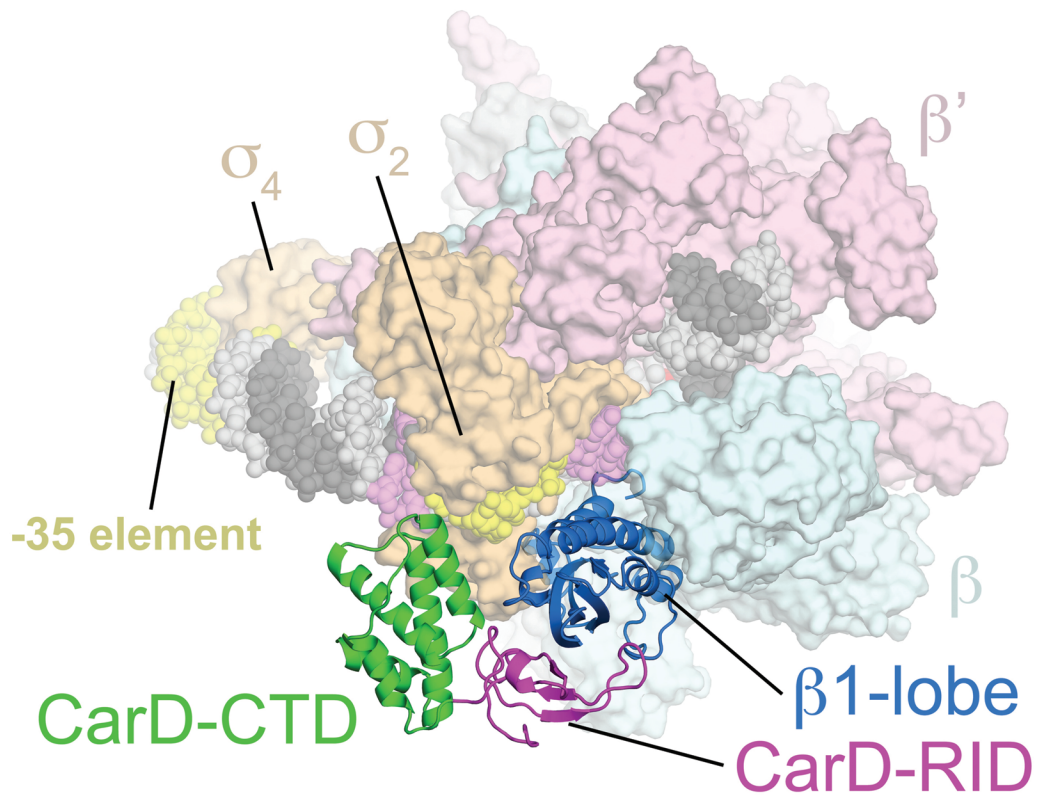

CarD/RP $\sigma$

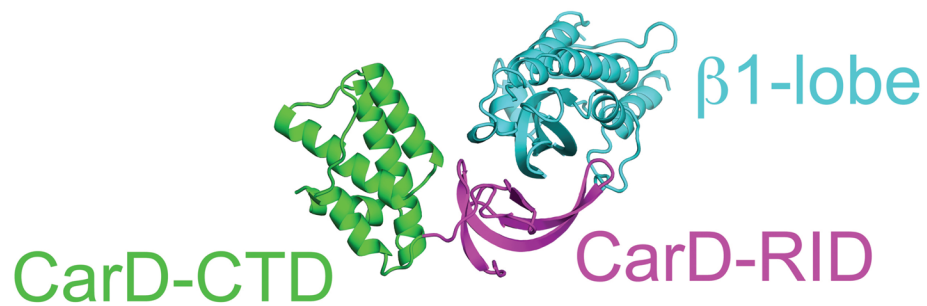

CarD/ $\beta 1$ -lobe

Supplement: supp [file elife-08505-supp-v1.zip]

*Tth* *rrnA* 23S promoter

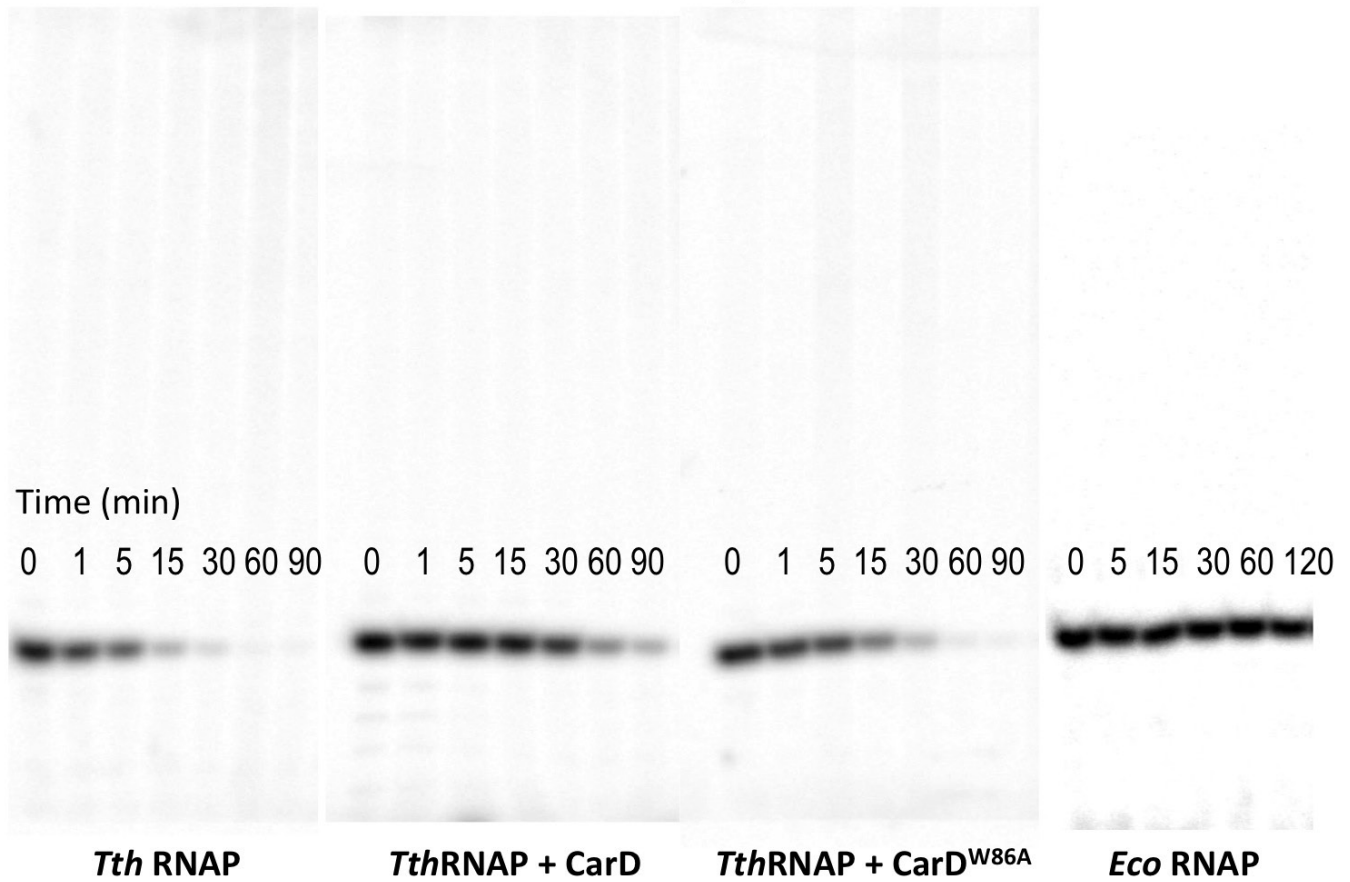

Bae et al., Figure 5 – figure supplement 1

Supplement: supp [file elife-08505-supp-v1.zip]

*Mtb rrnA* AP3 promoter

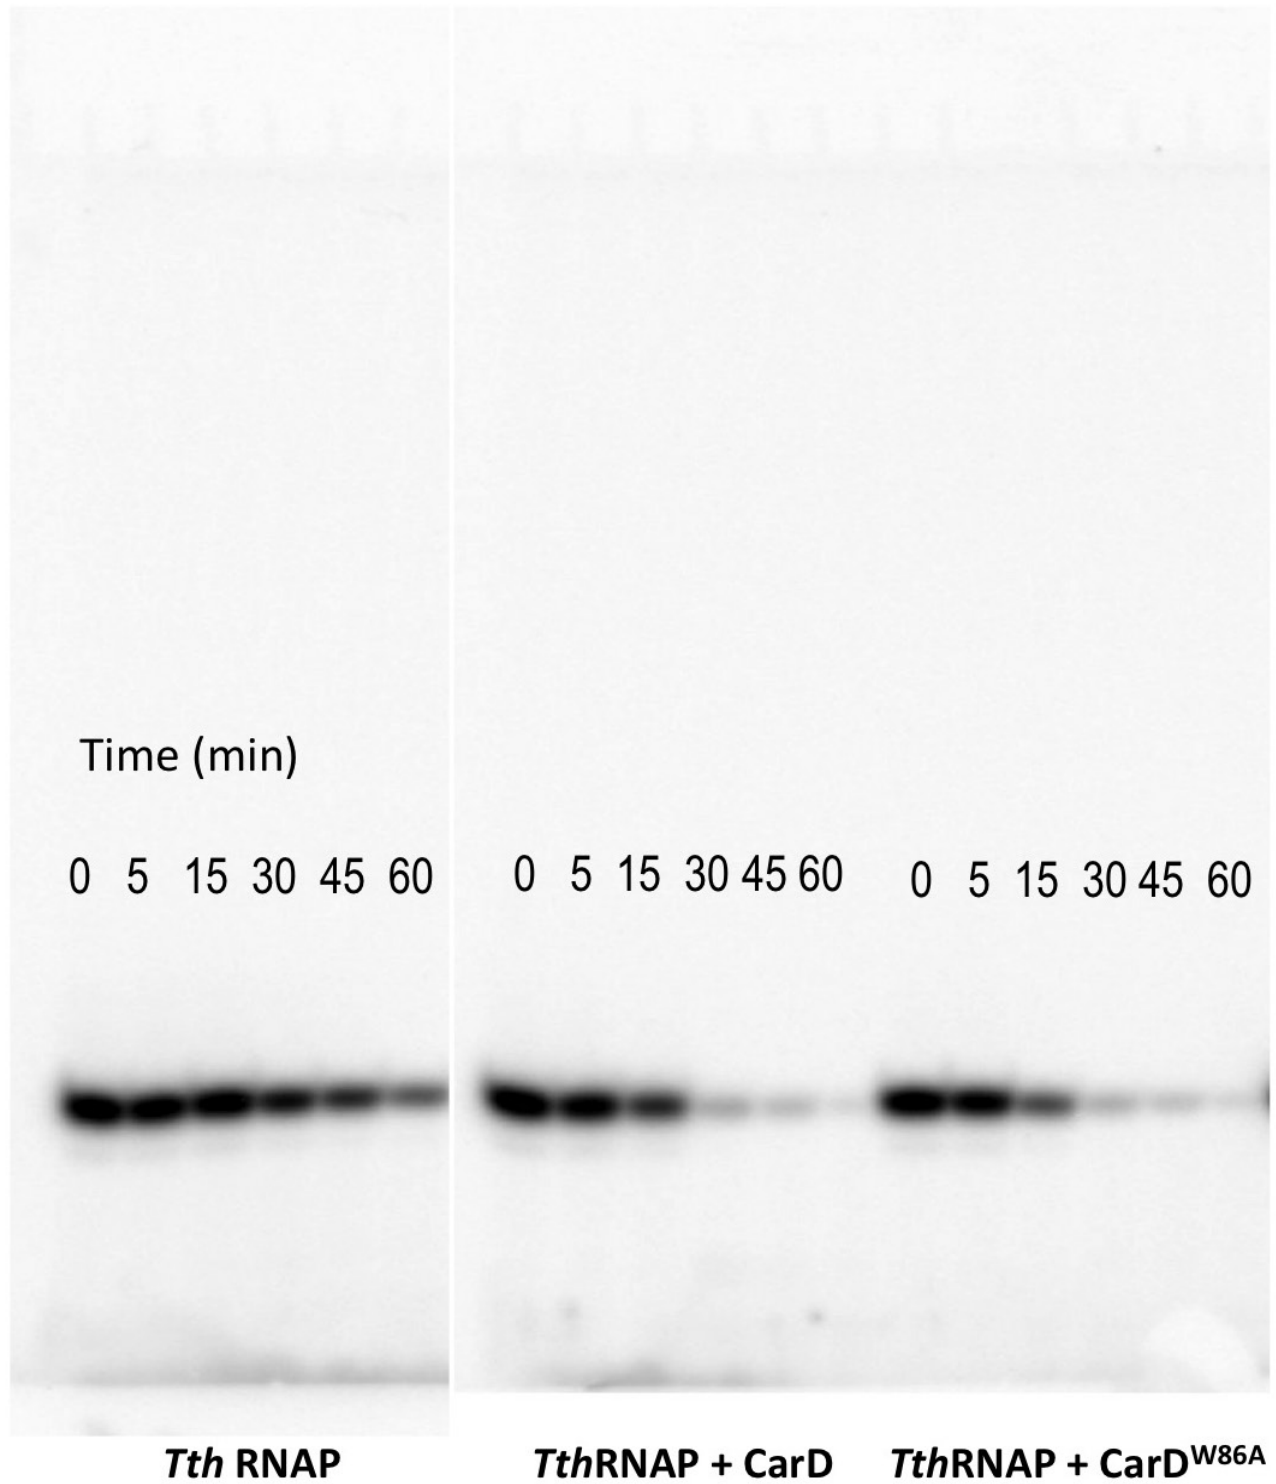

Supplement: supp [file elife-08505-supp-v1.zip]

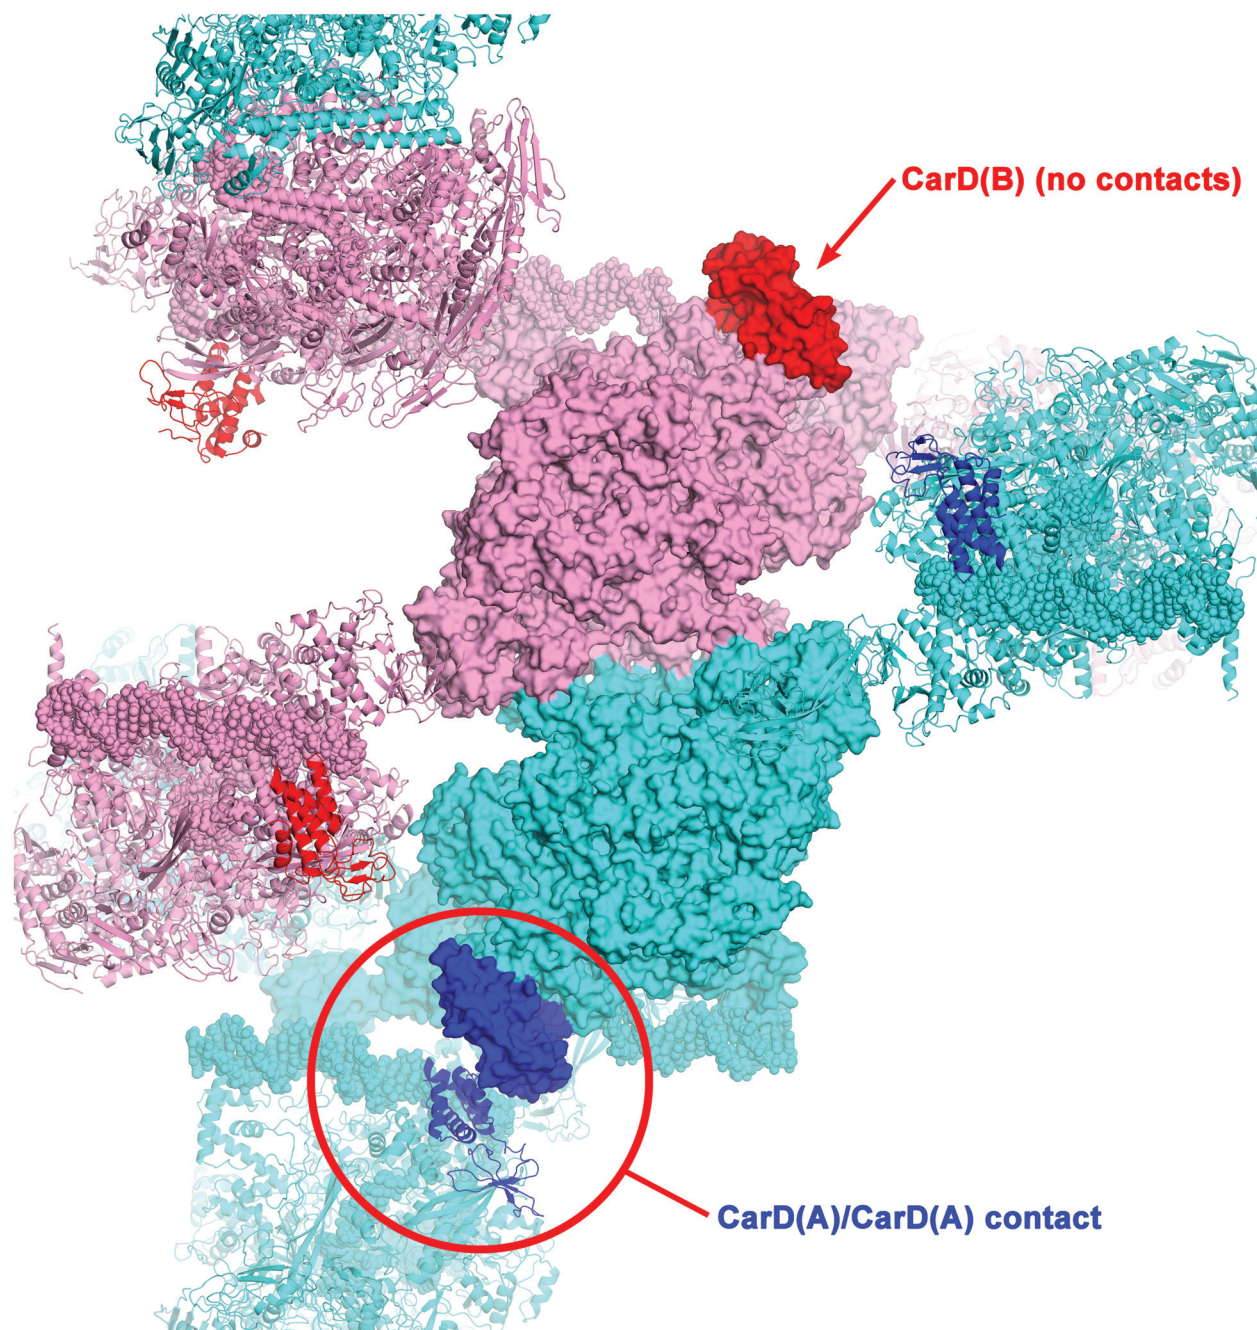

Bae et al, Figure 1 - figure supplement 2

Supplement: supp [file elife-08505-supp-v1.zip]

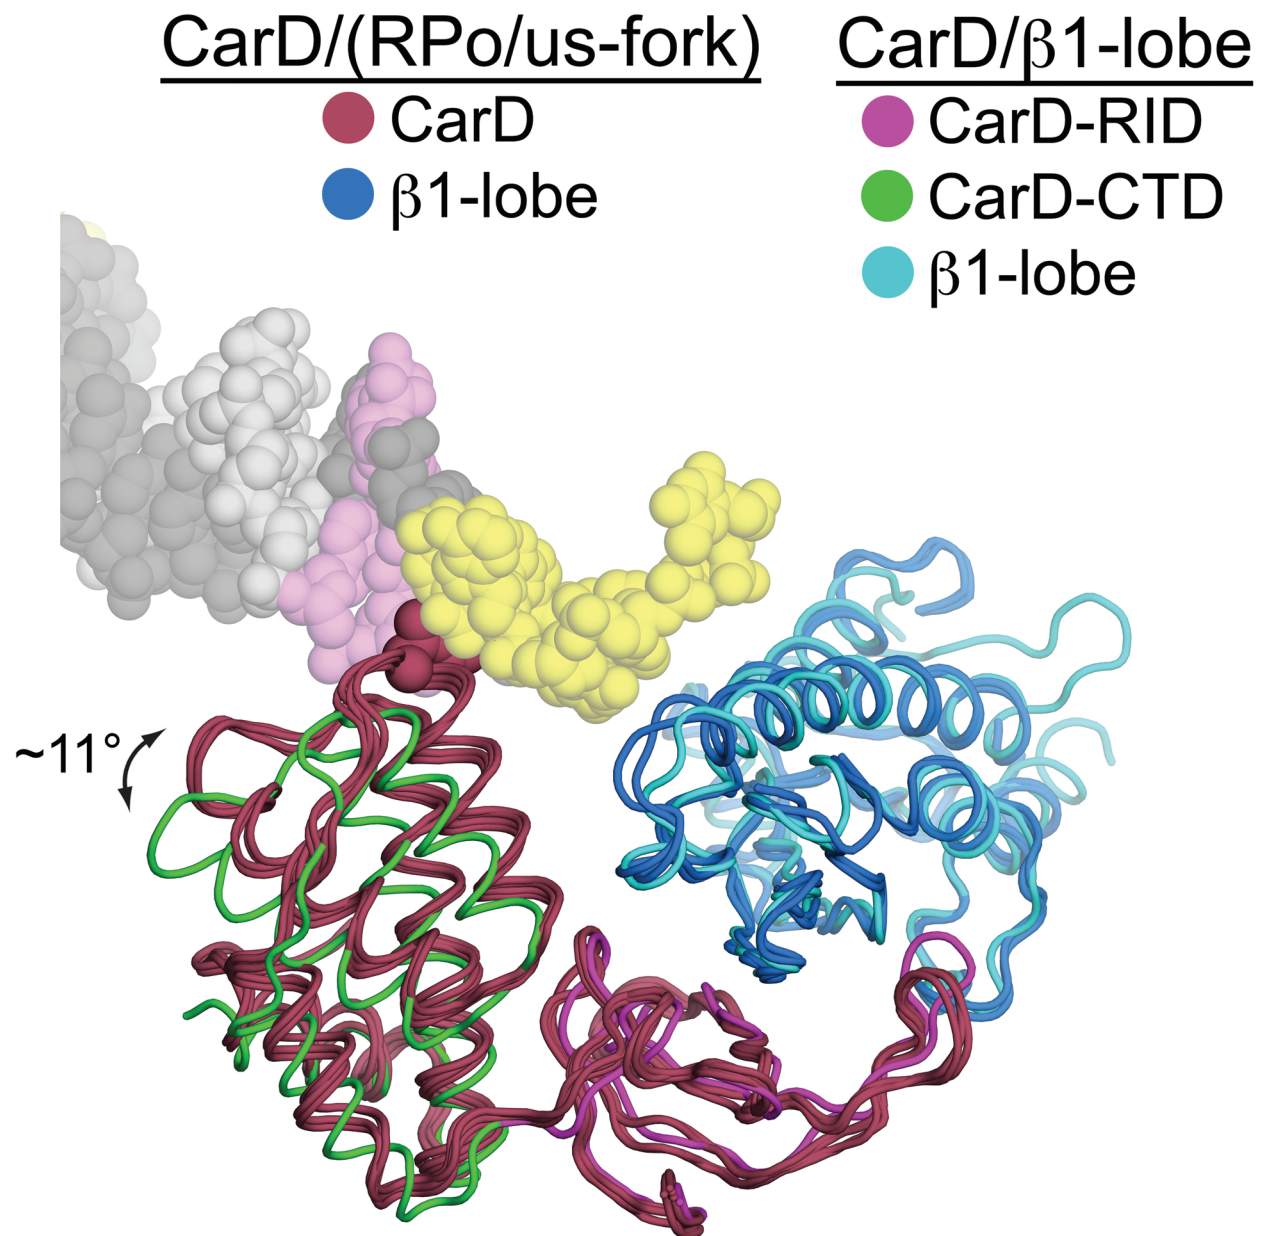

Bae et al, Figure 1 - figure supplement 4

Supplement: supp [file elife-08505-supp-v1.zip]

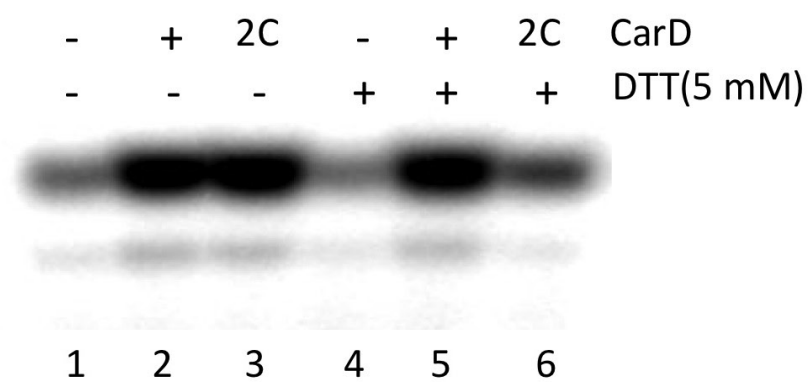

Bae et al., Figure 4 – figure supplement 1

Supplement: supp [file elife-08505-supp-v1.zip]

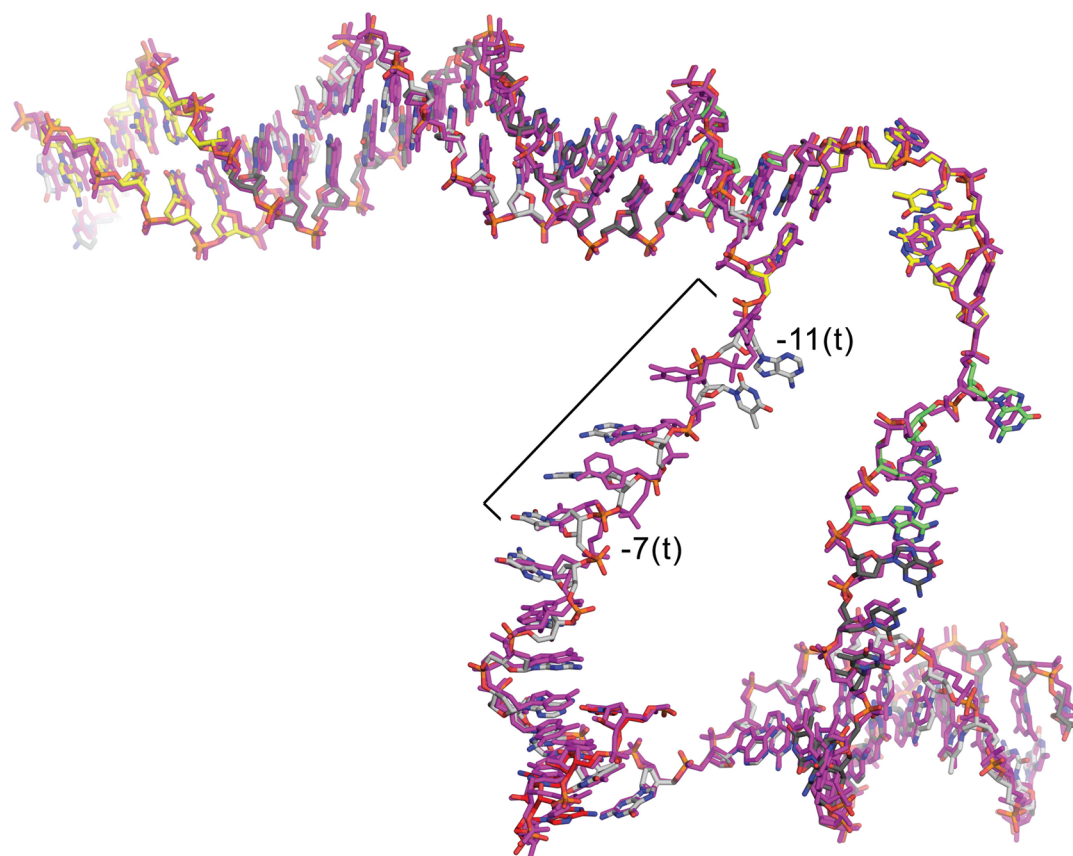

Bae et al, Figure 1 - figure supplement 6

Supplement: supp [file elife-08505-supp-v1.zip]
